1 **Design, construction, and deployment of an affordable and long-lasting moored deep-water**  
2 **fish aggregation device**

3

4 Eric VC Schneider<sup>1,3\*</sup>, Edward J Brooks<sup>1</sup>, Michael P Cortina<sup>2</sup>, David M Bailey<sup>3</sup>, Shaun S  
5 Killen<sup>3</sup>, Travis E Van Leeuwen<sup>1,4</sup>

6

7 <sup>1</sup> Cape Eleuthera Institute, Rock Sound, Eleuthera, The Bahamas. PO BOX EL-26029.

8 ericvcschneider@gmail.com; eddbrooks@ceibahamas.org

9 <sup>2</sup> The Center for Sustainable Development, Island School, Rock Sound, Eleuthera, The Bahamas.

10 PO BOX EL-26029. mikecortina@csdbahamas.org

11 <sup>3</sup> Institute of Biodiversity, Animal Health and Comparative Medicine, Graham Kerr Building,

12 University of Glasgow, Glasgow G12 8QQ, Scotland. david.bailey@glasgow.ac.uk;

13 shaun.killen@glasgow.ac.uk

14 <sup>4</sup> Fisheries and Oceans Canada, Salmonid Section, 80 East White Hills Road, PO Box 5667, St.

15 John's, Newfoundland, Canada A1C 5X1. travisvanleeuwen@ceibahamas.org

16

17 **Corresponding author:**

18 \*Eric VC Schneider, Cape Eleuthera Institute, Rock Sound, Eleuthera, The Bahamas. PO BOX

19 EL- 26029. Email: <ericvcschneider@gmail.com>

20

21 **Key-words:** fish aggregation device, FAD, fisheries, pelagic ecosystem, open-ocean, fisheries-

22 independent data, subsurface

23

24 **Running Title:** Design of a long-term subsurface FAD

25

26 ABSTRACT

27 Fish aggregation devices (FADs) are used worldwide to enhance the efficiency of various  
28 fisheries. Devices usually consist of a floating or subsurface component designed to exploit  
29 natural fish behavior, using species' attraction to structure (e.g. *Sargassum* spp.) to aggregate  
30 fish and increase capture success in open ocean environments. Concerns have arisen regarding  
31 the scale and management of FAD-associated fisheries, however, the efficiency of FADs to  
32 accumulate fish species also introduces the possibility for FADs to be used as conservation tools  
33 to study pelagic species ecology. Building on two successful and several failed deployments of  
34 anchored deep-water (>500 m) subsurface (10 m) FADs over three years in The Bahamas, and  
35 observations from the subsequent FAD monitoring program, the objectives of the paper are to: 1)  
36 provide details and considerations for the design, construction and deployment of an affordable  
37 and durable deep-water subsurface FAD that can be deployed using small boats; and 2) highlight  
38 the potential for a long-lasting moored FAD to be used as a sustainable and reliable scientific  
39 platform for pelagic species research and conservation, lending specifically to several research  
40 applications. This information will be useful for assessing the impacts that FADs and other  
41 anthropogenic marine infrastructure have on wild marine species, and their efficacy for  
42 conserving pelagic fish through increased encounters for study.

43

44 INTRODUCTION

45 The pelagic ocean is the largest habitat on earth by both surface area and volume,  
46 however, it is largely understudied compared to coastal or terrestrial ecosystems (Webb et al.

47 2010). The pelagic zone of the ocean provides important ecosystem services such as food and  
48 oxygen production, carbon cycling and climate stabilization (Worm et al. 2006), and is known to  
49 harbor considerable biodiversity (Angel 1993). With off-shore habitats under intense fishing  
50 pressures (Verity et al. 2002, Dulvy et al. 2008) and many fish stocks reaching either fully-  
51 exploited or over-exploited levels (Pons et al. 2017, FAO 2018), the need for better science,  
52 management and enforcement of the pelagic zone and its fisheries is increasing.

53 One aspect of fish behavior, particularly seen in pelagic species, that has substantially  
54 contributed to their harvest is their propensity to aggregate around floating structure (Castro et al.  
55 2002, Girard et al. 2004). First observed around natural objects such as driftwood and rafts of  
56 *Sargassum* spp., fishers have leveraged the aggregating behavior of fish around floating objects  
57 for centuries to increase catches while decreasing effort (Sadusky et al. 2018). Over the past  
58 several decades, intentionally constructed fish aggregation devices (FADs) have become a  
59 ubiquitous tool in pelagic purse seine fisheries (Moreno et al. 2016) with more than half of all  
60 tuna landed globally caught using FADs (Miyake et al. 2010). A wide range of epi-pelagic  
61 fishes have been documented aggregating to floating structures (Castro et al. 2002) including  
62 many high-level predators such as scombrids (tuna, wahoo), billfish and pelagic sharks which are  
63 groups of fishes most at risk of over-exploitation (Moyes et al. 2006).

64 Estimates suggest that 81,000 to 121,000 new FADs are deployed into the world's oceans  
65 annually, with many lost within the first year (Gershman et al. 2015). Thus, FADs pose  
66 numerous challenges to pelagic conservation and fisheries management. FADs have the  
67 potential to negatively affect several aspects of fish behavior, including feeding and movement,  
68 which could both result in lower individual and population fitness, although this does appear to  
69 be context dependent (Marsac et al. 2000). Further, such rapid increases in fishing technology

70 (i.e. FADs instrumented with GPS trackers and ‘fish-finder’ echosounders) have outpaced  
71 management developments (Baske et al. 2012). As search time and effort to locate schools of  
72 fish is typically decreased when using FADs, metrics that feed into stock assessments may no  
73 longer be compatible with traditional stock assessment models and must be updated accordingly  
74 (Moreno et al. 2016). Finally, the majority of FAD-fisheries utilize purse seine nets which are  
75 relatively non-selective in terms of species or size class and often result in considerable bycatch  
76 (Hallier and Gaertner 2008, Amande et al. 2008). When working to manage an industry that  
77 utilizes such powerful fishing tools as FADs, extra attention must be applied to ensure the  
78 sustainability of targeted stocks and bycatch.

79         Recently, there has been a concerted effort to utilize instrumented FADs and to work  
80 cooperatively with the fishing industry to increase the capacity for pelagic species research in  
81 this often difficult to access and vast habitat (Brehmer et al. 2019, Davies et al. 2014).  
82 However, these initiatives typically use FADs that are actively fished and free-floating which  
83 may bias research towards geographical areas that are chosen by fishing fleets and potentially  
84 masking ecological phenomena due to the nature of this extractive process. Additionally, most  
85 drifting FADs would not be accessible by small boats with shorter ranges, and they have a  
86 relatively short functional life of less than one year before degrading or washing out of range and  
87 / or ashore, limiting the feasibility of long-term biological studies or oceanographic monitoring  
88 (Lopez et al. 2017). Therefore, to address these concerns, it is important to invest in the  
89 collection of fisheries-independent data utilizing long-lasting anchored FADs to better  
90 understand the status and trends of commercially important fish stocks (Moreno et al. 2016).  
91 Depending on location, anchored FADs may allow greater accessibility to undertake monitoring  
92 work, can facilitate a wide array of instrumentation both above and below the surface of the

93 ocean, and will allow for longer studies to occur if designed properly. After an extensive  
94 literature review, it became apparent that few resources existed on the design, construction and  
95 deployment of anchored FADs for study, despite their widespread use in the fishing industry.  
96 For studies that did exist, FADs were either deployed from large boats, used materials difficult to  
97 purchase and ship to remote locations, or were expensive. Additionally, many papers did not  
98 include detailed information regarding FAD materials, design, construction, or deployment,  
99 making the process even more challenging (review detailed in Table 1).

100 Here we detail the design, construction, deployment and utility of an anchored deep-  
101 water, subsurface FAD that is durable and long lasting, easily reproducible, and specifically  
102 intended to facilitate research. The durability and moored nature of the design makes the FAD  
103 less prone to rapid loss or damage, and the low cost of the FAD allows for the possibility of  
104 several to be deployed using small boats and facilitate much needed replication and manipulation  
105 in experimental designs, a component often lacking in the area of study. While the subsurface  
106 aspect of these FADs was designed to reduce surface-associated damage and to facilitate specific  
107 research objectives, any potential trade-offs between constructing a subsurface FAD and fish  
108 attraction / aggregation are also a point of interest and are detailed below.

109

## 110 METHODS

### 111 *FAD Design*

112 The main design objectives were to create a long-lasting subsurface structure without any  
113 surface markers, deep enough to avoid surge-associated damage or navigational hazards, while  
114 still shallow enough to be accessible to divers and avoid pressure-related damage to the steel  
115 buoys. The subsurface float created a taut mooring line, which is necessary to facilitate several

116 specific research objectives, and 10 m to 15 m depth was decided to be an acceptable target  
117 range for the float although subsurface FADs are not commonly deployed at bottom depths >  
118 600 m which is novel here (Chapman et al. 2005). Further, after an extensive literature search it  
119 was apparent that few examples existed, and of those, none fulfilled our objectives for use. For  
120 example, Weng et al. (2013) used a subsurface FAD at a bottom depth of 415 m, however, the  
121 buoy depth of 50 m was inaccessible to divers. Further, details of an array of subsurface FADs  
122 around Okinawa, Japan indicate subsurface FADs at bottom depths up to 2000 m. However, the  
123 materials and deployment were costly, and structure depth ranged from 20 m to 100 m  
124 subsurface which minimizes survey time available for divers or renders it inaccessible (Sokimi  
125 2006). The closest example to those used here is a subsurface FAD array in Hawaii described by  
126 Higashi (1994) with a bottom depth range of 366 m to 549 m and a buoy depth of 18 m to 21 m,  
127 but little detail describing the construction and deployment are available. From the limited  
128 information available, it suggests a large naval vessel was used for deployment and that the FAD  
129 construction used galvanized steel cable, suggesting neither a simple nor cheap construction and  
130 deployment process.

131 The FADs used in our study consisted of an anchor block, a vertical mooring line (600  
132 m) and two tethered subsurface steel buoys (Fig. 1). The anchor block used to moor the FAD to  
133 the seafloor was made of concrete and measured 122 cm L x 122 cm W x 84 cm H (1.25 m<sup>3</sup>,  
134 ~2900 kg weight on land, ~1620 kg weight in water).

### 135 *Construction*

136 Steel reinforcing lattice (#4 rebar) was laid as the concrete was being placed, and a  
137 stainless steel round stock bail (Fig. 2) was incorporated beneath the last layer of lattice so that  
138 the top of the bail protruded from the center of the block to aid in mooring line attachment. A

139 shackle (7/8" bolt through) was used to attach 4 meters of 3/4" long-link chain to the bail anchor  
140 point between the block and mooring line. The chain was used to prevent chaffing of the anchor  
141 line against the anchor block in the event of converting the structure to a surface FAD.  
142 However, this was determined to be unnecessary for subsurface orientation because the tension  
143 in the mooring line, by default, prevents the anchor line from contacting the anchor block. This  
144 was followed by a 7/8" bolt through shackle, a 7/8" eye by eye swivel, another 7/8" shackle and  
145 finally a size 4 rope connector (Samson Nylite, Ferndale, Washington, USA; Fig. 3).

146         Eight-strand 1" polypropylene line (5,817 kg minimum tensile strength) was used as the  
147 mooring line and attached to rope connectors via an eye-splice. The rope connector prevented  
148 the eye splice from chaffing against the metal rigging. End-to-end splices were used any time  
149 the line needed to be extended. A continuous length of rope for these depths would require  
150 special order and abnormally large spools to hold the rope which are heavy, cumbersome, and  
151 expensive to ship. The same series of hardware was repeated at the end of the line (rope  
152 connector, swivel, and shackle), however this series was then followed by a 7/8" master link  
153 (Fig. 3).

154         The floating portion of the FAD structure was comprised of two round 71 cm diameter  
155 steel buoys (54 kg weight, 181 kg buoyancy each) tethered to the master link using 2 meters of  
156 1/2" three-strand polypropylene line that was eye-spliced through a rope thimble. This is similar  
157 in size and surface area to the flotation component of drifting FADs used in some commercial  
158 tuna fisheries. However, FADs used in commercial fisheries often incorporate subsurface  
159 netting, palm fronds, synthetic streamers, or other structure below the surface. These additions  
160 were not included in this design to avoid animal entanglement (Filmlalter et al. 2013) and to  
161 maintain clearance along the mooring line for equipment deployment (hydrophones, acoustic

162 receivers and oceanographic monitoring equipment) and retrieval during future stages of the  
163 research program.

#### 164 *Deployment*

165         Following the construction of the individual components on land, the anchor was  
166 transported into shallow water at a nearby marina using a crane truck. Although in this case a  
167 crane truck was used, the block could be constructed on a platform at the edge of the water and  
168 deployed using rollers or a winch for simplicity. Once the anchor was submerged, two lift bags  
169 (SP2000, Subsolve, North Kingstown, Rhode Island, USA) were attached to the anchor bail  
170 using a release under load mechanism (Sea Catch TR7, MacMillan Design, Gig Harbor,  
171 Washington, USA). A safety line was attached between the block and lift bag to prevent  
172 premature deployment. Lift bags were inflated with compressed air and the anchor raised off the  
173 bottom for towing behind a small boat. Once at the deployment location, a second small vessel  
174 slowly released the mooring line overboard and onto the surface of the water down-current and  
175 away from the anchor attachment point. A polyethylene ball float was attached to the free end of  
176 the mooring line to aid in visualization of the rope during and after deployment. Following the  
177 deployment of the mooring line from the vessel, snorkelers attached the anchor chain to the bail  
178 using a shackle, removed the safety line between the block and the lift bags, and released the  
179 load-bearing mechanism using a nylon rip cord thus dropping the block (Fig. 4). The location of  
180 the drop was positioned to be 1/3 of the depth up-current of the targeted FAD location to account  
181 for drag on the line pulling the block in the down-current direction.

182         Following the anchor drop, the excess mooring line on the surface was recovered. The  
183 mooring line was then elongated using lift bags attached at depth to simulate the ultimate tension  
184 on the line from the FAD buoys. To do so, divers on SCUBA attached a lift bag to the mooring



185 line using a Prusik hitch at 25 m depth and filled the lift bag with compressed air (Fig. 5).  
186 Following the lift bag's ascent to the surface, this process was continued until the line was under  
187 approximately 600 kg of tension, evidenced by the 900 kg lift bag filled to approximately 66% of  
188 total volume, and positioned at a static depth of 10 m without further elongation. At least 24  
189 hours were allowed for a complete tidal cycle, and to allow the mooring line to undergo phase  
190 one creep to its ultimate length under load. If this time period resulted in reduced tension, or if  
191 the lift bags reached the surface, the mooring line elongation process was repeated. When the  
192 line was determined to have undergone all elongation, an eye-splice was used to attach a rope  
193 protector to the mooring line just above the lift bag. A shackle, master link, and a 15 m safety  
194 line with a fully inflated SP2000 lift bag were attached to the trailing end of the mooring line at  
195 the surface to further ensure the mooring line did not retract. Two individually rigged steel  
196 buoys were spliced onto the master link. After the attachment was complete, the lift bag under  
197 tension was released allowing the recoil of the mooring line to submerge the buoys to a depth of  
198 10 to 15 m, at which point the inflated surface lift bag prevented any possible further descent. A  
199 small polyethylene buoy was finally attached to the master link and filled with compressed air as  
200 needed to fine tune buoyancy to the targeted 10 m depth resting point. Lastly, a safety line (3/8"  
201 Spectra 12-strand braided line, 6,305 kg minimum tensile strength) was tied to the master link,  
202 run through each eye-attachment point on the two buoys and tied back to the master link. In the  
203 case of eye-ring failure or a buoy tether being severed, this line provides a cut-resistant back-up  
204 to avoid the loss of a buoy or the entire FAD.

#### 205 *Removal Potential*

206 While the durability and moored nature of the FAD design presented here results in a  
207 robust and maintainable platform for longer time scales, these FADs are removable using the

208 same equipment and process needed for deployment and users can therefore avoid contributing  
209 marine debris to the ocean following the conclusion of research activities. Although this would  
210 involve some effort, divers repeatedly deploying lift bags down the mooring line will slowly  
211 raise the anchor block which can then be towed to shallow water and allow for retrieval of the  
212 entire FAD.

213

## 214 RESULTS AND DISCUSSION

### 215 *Design Considerations*

216 Materials and operations were all considered and selected to not only meet the project  
217 objectives, but to be accessible by a wide array of potential users including those at remote field  
218 stations or research groups with limited funding and resources. It has been shown that price is  
219 often a limiting factor during FAD creation and installation in remote island locations, and  
220 although this is typically documented in the scope of bolstering fishing communities (Bell et al.  
221 2015), financial restraints will similarly apply to research groups. During the development and  
222 expansion of the Pacific FAD fishery, 2000 to 3000 USD was targeted for a reasonable total cost  
223 for a deep-water FAD intended to last approximately 2 years (Chapman et al. 2005), so the  
224 \$5000 USD total cost per FAD in this project was deemed appropriate when designing for a  
225 durable longer-lasting structure. Longevity is also a high concern for surface FADs, with  
226 wave/weather damage or vandalism frequently leading to loss of the FAD in less than two years  
227 (e.g. Chapman et al. 2005, Tilley et al. 2019). With these considerations, two robust yet  
228 affordable subsurface FADs were designed and have remained in place for three years,  
229 withstanding two minor hurricanes. Inspections in June 2019 (one and a half years after  
230 deployment), using deep sea submersible surveys in the area, revealed that all parts of the FAD

231 design inaccessible to divers remain in good condition. The concrete anchor block, steel  
232 connections (shackles, chain, swivels, etc.), polypropylene mooring line and steel buoys were all  
233 considered to be affordable and possible to source and ship to a remote location and are standard  
234 options for offshore FADs (Chapman et al. 2005). Recently, there has been considerable effort  
235 to construct FADs from biodegradable materials to decrease marine debris and the potential  
236 negative impacts on wildlife such as entanglement (Moreno et al. 2018). Increasing longevity  
237 through careful design and robust synthetic materials was pursued during this project, although  
238 this could easily be adapted for a shorter-lived but biodegradable version. Additionally, the  
239 FADs were deployed using only SCUBA divers, a crane truck (or equivalent for pushing the  
240 anchor into the water), lift bags, and two 8 m long inboard panga vessels. One possible price  
241 reduction was tested by using three A-6 sized polyethylene buoys (Polyform A-6) instead of steel  
242 buoys, however this was quickly proven to not work. Flexible buoys expand or contract with  
243 minimal changes in water depth associated with the mooring line stretching or contracting, which  
244 in turn changes the buoyancy and prevents a stable target depth. Additionally, several flexible  
245 buoys showed marks consistent with teeth punctures by predatory fishes. Therefore, steel buoys  
246 soon replaced the flexible buoys after deployment of the first FAD and are highly recommended.  
247 Alternative mooring line materials were also considered, and materials such as Spectra or  
248 Dyneema are cut-resistant and would dramatically reduce phase 1 creep, making buoy placement  
249 at a target depth easier, however, these options are considerably more expensive and were  
250 avoided for this reason.

251         The subsurface aspect of the FAD design was chosen for several reasons related to the  
252 objectives of the project. First, 10 m depth prevents disruption of the structure by storm surge or  
253 any surface weather and would prevent any potential boat strikes, adding to the longevity of the

254 infrastructure. Additionally, 10 m is an easily accessible and safe depth for both SCUBA and  
255 freedivers to work or deploy/retrieve equipment and does not pose any serious pressure-related  
256 stress to the buoys or equipment (at 2 atmospheres). Additionally, the subsurface aspect of the  
257 FADs used in this study, combined with the buoyancy of the buoys used (362 kg of lift total),  
258 resulted in a taut mooring line. Therefore, this design presents several unique opportunities for  
259 research activities. First, equipment can be shuttled up and down the mooring line with a simple  
260 rigging system, enabling fixed depth/location deployment of various instruments. This would  
261 otherwise be difficult without a taut mooring line. Additionally, keeping the structure  
262 underneath the surface and away from any surge or waves results in a nearly silent structure,  
263 presenting opportunities for investigation into fish sensory biology in the open ocean, and for  
264 better hydroacoustic data collection (e.g. hydrophone deployment for cetacean surveys). Finally,  
265 this tension ensured that the FAD buoys remained at the known GPS location and did not sway  
266 with tidal or current flow. Although this study area does not experience significant currents,  
267 locations with strong tidal flow should consider the impact of horizontal forces on the FAD and  
268 mooring line.

269         Several location parameters were taken into consideration when selecting locations for  
270 the subsurface FADs, and the Exuma Sound (in close proximity to the Cape Eleuthera Institute  
271 and base of research operations) was ideally suited for this. First, a deep-water drop off was  
272 located near-shore and accessible from the research station. Second, the area is a known  
273 migration route for pelagic fishes. Although the bathymetry had not been accurately described,  
274 several known depth points from previous deep-water research were used to select suitable  
275 locations and to predetermine mooring line lengths.

276 *Research Applications and Conclusions*

277           The subsurface anchored design of the FADs used in this study has proven to be a stable  
278 and diverse scientific platform in excess of three years. Many of the epipelagic fish species that  
279 occur in the region have been documented at the FADs, ranging in trophic level and size (Table  
280 2). These anchored FADs allow the fish community to be continually monitored over long  
281 temporal scales and can facilitate short and long-term experimental studies through increased  
282 accessibility that would not be possible when using conventional offshore drifting FADs.  
283 Dagorn et al. (2010) previously argued that anchored FADs are acceptable and useful proxies for  
284 drifting FADs to address research questions such as the ecological trap hypothesis, and that they  
285 pose accessibility advantages while maintaining contextual similarities to their drifting  
286 counterparts. A variety of methods that have been recently performed on surface FADs, many of  
287 which were proposed by Moreno et al. (2016) as research priorities, are detailed in Table 3 with  
288 an additional section highlighting the advantages of the subsurface design proposed here.

289           There has also been a recent interest in understanding the effects of other anthropogenic  
290 marine infrastructure on fish assemblages and wider marine communities. For example,  
291 aquaculture cage sites have proven to have attractive or repulsive effects on various fishes and  
292 shellfish, however, the long term and ecosystem-wide consequences are still not fully understood  
293 (Callier et al. 2017). Offshore oil and gas platforms are also known to attract marine life (Fujii  
294 2016) and along with sea cage sites are increasing worldwide (Dafforn et al. 2015, Gentry et al.  
295 2016). Although this trend of ocean exploitation is widely understood to be detrimental to  
296 marine biodiversity, there is some promise in these structures being decommissioned  
297 strategically and acting as productive artificial habitat. Several studies (including Smith et al.  
298 2016) have shown that artificial reefs can harbor similar biodiversity and abundance as natural  
299 systems, and many decommissioned offshore energy platforms may act as localized marine

300 protected areas, either through maritime legislation preventing activity in the area or through  
301 difficulty of adapting commercial fishing techniques such as trawl nets to these contexts (Fujii  
302 2016). Therefore, strategically designed FADs that are not open-access can act as useful  
303 research platforms to develop new monitoring approaches while maintaining the integrity of the  
304 study population, and enhance our understanding of how anthropogenic marine usage is affecting  
305 biodiversity.

306         Additionally, many animals that utilize pelagic FADs are fish species known to undergo  
307 long migrations (Hallier and Gaertner 2008). Whether following seasonal changes in food  
308 abundance, thermal windows or breeding opportunities (Alerstam et al. 2003), this migratory  
309 behavior most likely exposes them to various fisheries pressures and overexploitation.  
310 Knowledge of how migratory animals respond to variable conditions experienced during  
311 migration is a central component to understanding long-distance movement patterns and their  
312 management. If data is collected consistently, this information can help estimate population size,  
313 increase understanding of demographic variables needed in the development of population  
314 viability models, reveal how wild fish species are impacted by anthropogenically-altered  
315 habitats, and potentially be used for novel conservation applications. These include the  
316 construction of scientific platforms (such as deep-water subsurface FADs) along known  
317 migration routes to aid in the study of elusive migratory animals, or the ability to alter  
318 movements of migratory animals through protected seascapes by enhancing habitat preferences  
319 in these areas to minimize harvest.

320         Pelagic animals are inherently difficult to study due to the expanse of their habitat, life  
321 history and behavior, resulting in a comparatively weak understanding of pelagic species ecology  
322 and biology (Block et al. 2003). Therefore, in response to the recent call for developing methods

323 to collect fisheries-independent data to be used in management and stock assessments (Moreno  
324 et al. 2016), a network of economical, instrumented, research-oriented subsurface FADs such as  
325 those proposed here could provide substantial ecological and fisheries data that is desperately  
326 needed to effectively conserve pelagic ecosystems and their biodiversity.

327

## 328 ACKNOWLEDGEMENTS

329 This is contribution #1 of the Exuma Sound Ecosystem Research Project. We would like  
330 to thank The Moore Charitable Foundation / Moore Bahamas Foundation for generously funding  
331 this work. SKK was supported by a NERC Standard Grant NE/T008334/1. We extend many  
332 thanks to the staff, interns, students, and visiting researchers of the Cape Eleuthera Institute and  
333 The Island School for their extensive assistance including M Israel, D Huber, P Osborn, C Hsia,  
334 D Orrell, E Good, G Sayles, D Grady, and W Barnes, in addition to the students of The Island  
335 School FAD research classes. We thank L Madden for assistance in creation of all graphics  
336 included in the figures. The authors have no competing interests.

337

## 338 AUTHOR'S CONTRIBUTIONS

339 TV, ES conceptualized the manuscript; ES, TV, MC wrote the manuscript and all authors  
340 contributed substantially to revisions and accept responsibility for this work.

341

## 342 LITERATURE CITED

343 Alerstam T., Hedenstrom A., Akesson S. 2003. Long-distance migration: evolution and  
344 determinants. *Oikos*. 103: 247-260.  
345 Amande M.-J., Chassot E., Chavance P., Pianet R. 2008. Silky shark (*Carcharhinus falciformis*)  
346 bycatch in the French tuna purse-seine fishery of the Indian Ocean. IOTC.  
347 Angel M.V. 1993. Biodiversity of the pelagic ocean. *Conserv. Biol.* 7(4): 760-772.

- 348 Baske A., Gibbon J., Benn J., Nickson A. 2012. Estimating the use of drifting fish aggregation  
349 devices (FADs) around the globe. Pew Environ. Group. Discussion Paper.
- 350 Bell J.D., Albert J., Andrefouet S., Andrew N.L., Blanc M., Bright P., Brogan D., Campbell B.,  
351 Govan H., Hampton J., Hanich Q., Harley S., Jorari A., Lincoln Smith M., Pontifex S.,  
352 Sharp M.K., Sokimi W., Webb A. 2015. Optimising the use of near shore fish  
353 aggregating devices for food security in the Pacific Islands. *Mar. Pol.* 56: 98-105.
- 354 Block B.A., Costa D.P., Boehlert G.W., Kochevar R.E. 2003. Revealing pelagic habitat use: the  
355 tagging of Pacific pelagics program. *Oceanologica Acta* 25: 255-266.
- 356 Brehmer P., Sancho G., Trygonis V., Itano D., Dalen J., Fuchs A., Faraj A., Taquet M. 2019.  
357 Towards an autonomous pelagic observatory: experiences from monitoring fish  
358 communities around drifting FADs. *Thalassas* 35: 177-189.
- 359 Buckley T.W., Miller B.S. 1994. Feeding habits of yellowfin tuna associated with fish  
360 aggregation devices in American Samoa. *Bul. Mar. Sci.* 55(2-3): 445-459.
- 361 Callier M.D., Byron C.J., Bengtson D.A., Cranford P.J., Cross S.F., Focken U., Jansen H.M.,  
362 Kamermans P., Kiessling A., Landry T., O'Beirn F., Petersson E., Rheault R.B., Strand  
363 O., Sundell K., Svasand T., Wikfors G.H., McKindsey C.W. 2017. Attraction and  
364 repulsion of mobile wild organisms to finfish and shellfish aquaculture: a review. *Rev.*  
365 *Aquacult.* 10(4): 924-949.
- 366 Castro J.J., Santiago J.A., Hernandez-Garcia V. 1999. Fish associated with fish aggregation  
367 devices off the Canary Islands (central-east Atlantic). *Sci. Mar.* 63(3-4): 191-198.
- 368 Castro J.J., Santiago J.A., Santana-Ortega AT. 2002. A general theory on fish aggregation to  
369 floating objects: an alternative to the meeting point hypothesis. *Rev. Fish Biol. Fish.*  
370 11: 255-277.
- 371 Chapman L., Pasisi B., Bertram I., Beverly S., Sokimi W. 2005. Manual on fish aggregating  
372 devices (FADs): lower-cost moorings and programme management. Secretariat of the  
373 Pacific Community.
- 374 Dafforn K.A., Glasby T.M., Airoidi L., Rivero N.K., Mayer-Pinto M., Johnston E.L. 2015.  
375 Marine urbanization: an ecological framework for designing multifunctional artificial  
376 structures. *Front. Ecol. Environ.* 13(2): 82-90.



- 377 Dagorn L., Pincock D., Girard C., Holland K., Taquet M., Sancho G., Itano D., Aumeeruddy R.  
378 2007. Satellite-linked acoustic receivers to observe behavior of fish in remote areas.  
379 *Aquat. Liv. Resour.* 20: 307-312.
- 380 Dagorn L., Holland K.N., Filmalter J. 2010. Are drifting FADs essential for testing the  
381 ecological trap hypothesis? *Fish. Res.* 106: 60-63.
- 382 Davies T.K., Mees C.C., Milner-Gulland E.J. 2014. The past, present and future use of drifting  
383 fish aggregating devices (FADs) in the Indian Ocean. *Mar. Pol.* 45: 163-70.
- 384 Doray M., Josse E., Gervain P., Reynal L., Chantrel J. 2007. Joint use of echosounding, fishing  
385 and video techniques to assess the structure of fish aggregations around moored fish  
386 aggregating devices in Martinique (Lesser Antilles). *Aquat. Liv. Resour.* 20: 357- 366.
- 387 Dulvy N.K., Baum J.K., Clarke S., Compagno L.J.V., Cortés E., Domingo A., Fordham S.,  
388 Fowler S., Francis M.P., Gibson C., Martínez J., Musick J.A., Soldo A., Stevens J.D.,  
389 Valenti S. 2008. You can swim but you can't hide: the global status and conservation of  
390 oceanic pelagic sharks and rays. *Aquat. Cons.: Mar. Fresh. Ecos.* 18(5): 459-482.
- 391 FAO 2018. The state of world fisheries and aquaculture 2018- meeting the sustainable  
392 development goals, Rome. License: CC BY-NC-SA 3.0 IGO.
- 393 Filmalter J., Cowley P., Forget F., Dagorn L. 2015. Fine-scale 3-dimensional movement  
394 behaviour of silky sharks *Carcharhinus falciformis* associated with fish aggregating  
395 devices (FADs). *Mar. Ecol. Prog. Ser.* 539: 207-223.
- 396 Filmalter J.D., Capello M., Deneubourg J.-L., Cowley P.D., Dagorn L. 2013. Looking behind the  
397 curtain: quantifying massive shark mortality in fish aggregating devices. *Front. Ecol.*  
398 *Env.* 11(6): 291-296.
- 399 Fujii T. 2016. Potential influence of offshore oil and gas platforms on the feeding ecology of fish  
400 assemblages in the North Sea. *Mar. Ecol. Prog. Ser.* 542: 167-186.
- 401 Gentry R.R., Lester S.E., Kappel C.V., White C., Bell T.W., Stevens J., Gaines S.D. 2017.  
402 Offshore aquaculture: spatial planning principles for sustainable development. *Ecol.*  
403 *Evol.* 7: 733-743.
- 404 Gershman D., Nickson A., O'Toole M. 2015. Estimating the use of FADs around the world. Pew  
405 Environment Group.

- 406 Gervain P., Reynal L., Defoe J., Ishida M., Mohammed E. 2015. Manual of best practices in  
407 fisheries that use moored fish aggregating devices: FAD design, construction and  
408 deployment. CRFM Special Publication 6(1): 1-55.
- 409 Girard C., Benhamou S., Dagorn L. 2004. FAD: fish aggregating device or fish attracting  
410 device? A new analysis of yellowfin tuna movements around floating objects. *Anim.*  
411 *Behav.* 67: 319-326.
- 412 Hallier J.-P., Gaertner D. 2008. Drifting fish aggregation devices could act as an ecological trap  
413 for tropical tuna species. *Mar. Ecol. Prog. Ser.* 353: 255-264.
- 414 Higashi G.R. 1994. Ten years of fish aggregating device (FAD) design development in Hawaii.  
415 *Bul. Mar. Sci.* 55(2-3): 651-666.
- 416 Itano D., Fukofuka S., Brogan D. 2004. The development, design and recent status of anchored  
417 and drifting FADs in the WCPO. Working Paper INF –FTWG-3, Standing Committee on  
418 Tuna and Billfish.
- 419 Lopez J., Moreno G., Lennert-Cody C., Maunder M., Sancristobal I., Caballero A., Dagorn L.  
420 2017. Environmental preferences of tuna and non-tuna species associated with drifting  
421 fish aggregating devices (DFADs) in the Atlantic Ocean, ascertained through fishers'  
422 echo-sounder buoys. *Deep-Sea Res. II.* 140: 127-138.
- 423 Lopez J., Moreno G., Boyra G., Dagorn L. 2016. A model based on data from echosounder  
424 buoys to estimate biomass of fish species associated with fish aggregating devices. *Fish.*  
425 *Bul.* 114: 166-178.
- 426 Marsac F., Fonteneau A., Menard F. 2000. Drifting FADs used in tuna fisheries: an ecological  
427 trap? *Proc. 1<sup>st</sup> Symp. on Tuna Fisheries and FADs.* Martinique.
- 428 Merten W., Rivera R., Appeldoorn R., Serrano K., Collazo O., Jimenez N. 2018. Use of video  
429 monitoring to quantify spatial and temporal patterns in fishing activity across sectors at  
430 moored fish aggregating devices off Puerto Rico. *Sci. Mar.* 82(2).
- 431 Mills D., Tilley A. 2019. Exploring options to improve livelihoods and resource management in  
432 Timor-Leste's coastal communities. *Rep. Austral. Cent. Intern. Ag. Res.* FR2019-46.
- 433 Miyake M.P., Guillotreau P., Sun C.-H., Ishimura G. 2010. Recent developments in the tuna  
434 industry. *FAO Fish. Aquac. Tech. Paper:* 543.
- 435 Moreno G., Dagorn L., Capello M., Lopez J., Filmalter J., Forget F., Sancristobal I., Holland K.  
436 2016. Fish aggregating devices (FADs) as scientific platforms. *Fish. Res.* 178:122-129.

- 437 Moreno G., Jauhary R., Adam S.M., Restrepo V. 2018. Moving away from synthetic materials  
438 used at FADs: evaluating biodegradable ropes degradation. *Coll. Vol. Sci. Papers* 74(5):  
439 2192-2198.
- 440 Moyes C.D., Fragoso N., Musyl M.K., Brill R.W. 2006. Predicting postrelease survival in large  
441 pelagic fish. *Trans. Amer. Fish. Soc.* 135: 1389-1397.
- 442 Pons M., Melnychuk M.C., Hilborn R. 2018. Management effectiveness of large pelagic  
443 fisheries in the high seas. *Fish Fish.* 19: 260-270.
- 444 Sadusky H., Chaibongsai P., Die D.J., Agar J., Shivlani M. 2018. Management of moored fish  
445 aggregation devices (FADs) in the Caribbean. *Coll. Vol. Sci. Papers.* 74(5): 2230-2242.
- 446 Smith J.A., Lowry M.B., Champion C., Suthers I.M. 2016. A designed artificial reef is among  
447 the most productive marine fish habitats: new metrics to address ‘production versus  
448 attraction.’ *Mar. Biol.* 163: 188.
- 449 Sokimi W. 2006. Fish aggregating devices: the Okinawa/Pacific experience. *Fish. News.- South*  
450 *Pacific Commission*, 119, 45.
- 451 Taquet M., Blanc M., Dagorn L., Filmalter J.D., Fonteneau A., Forget F., Gaertner J.C., Galzin  
452 R., Gervain P., Goujon M., Guillotreau P., Guyader O., Hall M., Holland K., Itano D.,  
453 Monteagudo J.P., Morales-Nin B., Reynal L., Sharp M., Sokimi W., Tanetoa M., Yen Kai  
454 Sun S. 2011. Artisanal and industrial FADs: A question of scale. *Tahiti conference*  
455 *reviews current FAD use and technology.* *Fish. News.* 136: 35-45.
- 456 Tilley A., Wilkinson S.P., Kolding J., Lopez-Angarita J., Pereira M., Mills D.J. 2019. Nearshore  
457 fish aggregating devices show positive outcomes for sustainable fisheries development in  
458 Timor-Leste. *Front. Mar. Sci.* 6: 487.
- 459 Tolotti M.T., Forget F., Capello M., Filmalter J.D., Hutchinson M., Itano D., Holland K., Dagorn  
460 L. 2020. Association dynamics of tuna and purse seine bycatch species with drifting fish  
461 aggregating devices (FADs) in the tropical eastern Atlantic Ocean. *Fish. Res.* 226:  
462 105521.
- 463 Verity P.G., Smetacek V., Smayda T.J. 2002. Status, trends and the future of the marine pelagic  
464 ecosystem. *Environ. Cons.* 29(2): 207-237.
- 465 Webb T.J., Vanden Berghe E., O’Dor R. 2010. Biodiversity’s big wet secret: The global  
466 distribution of marine biological records reveals chronic under-exploration of the deep  
467 pelagic ocean. *PLoS ONE.* 5(8): e10223.

468 Weng J.S., Hung M.K., Lai C.C., Wu L.J., Lee M.A., Liu K.M. 2013. Fine-scale vertical and  
469 horizontal movements of juvenile yellowfin tuna (*Thunnus albacares*) associated with a  
470 subsurface fish aggregating device (FAD) off southwestern Taiwan. Jour. App. Ichth. 29:  
471 990-1000.

472 Worm B., Barbier E.B., Beaumont N., Duffy J.E., Folke C., Halpern B.S., Jackson J.B.C., Lotze  
473 H.K., Micheli F., Palumbi S.R., Sala E., Selkoe K.A., Stachowicz J.J., Watson R. 2006.  
474 Impacts of biodiversity loss on ocean ecosystem services. Sci. 314: 787-790.

475

476

477

478

479

480

481

482

483

484

485

486

487

488

489 TABLES

490 Table 1. Selected examples from a literature review on studies using anchored FADs that include  
 491 information on materials or deployment, that are subsurface (or ‘midwater’), or that were  
 492 deployed in depths  $\geq 500$  m and therefore comparable to our proposed design. ‘Buoy Depth’ of 0  
 493 represents a surface FAD. Substantial and replicable information must be included on materials  
 494 used or deployment processes in order to qualify as ‘Yes’.

| <b>FAD Type</b>        | <b>Bottom Depth (m)</b> | <b>Buoy Depth (m)</b> | <b>Materials Info</b> | <b>Deployment Info</b> | <b>Location</b> | <b>Reference</b>       |
|------------------------|-------------------------|-----------------------|-----------------------|------------------------|-----------------|------------------------|
| Surface and subsurface | 300-2000                | 0-?                   | Yes                   | Yes                    | Pacific Islands | Chapman et al., 2005   |
| Surface                | <200                    | 0                     | Yes                   | Yes                    | Timor-Leste     | Mills & Tilley, 2019   |
| Surface                | 100-3000                | 0                     | Yes                   | Yes                    | Caribbean       | Gervain et al., 2015   |
| Surface and subsurface | 1000-2000               | 50-100                | Yes                   | No                     | Japan           | Sokimi, 2006           |
| Surface and subsurface | 146-2761                | 0-18                  | Yes                   | No                     | Hawaii          | Higashi, 1994          |
| Surface                | <5000                   | 0                     | Yes                   | No                     | Pacific Islands | Itano et al., 2004     |
| Subsurface             | 415                     | 50                    | No                    | No                     | Taiwan          | Weng et al., 2013      |
| Surface and subsurface | 50-2500                 | ?                     | No                    | No                     | Pacific Islands | Taquet et al., 2011    |
| Surface and subsurface | 300-700                 | 0-?                   | No                    | No                     | Pacific Islands | Bell et al., 2015      |
| Surface                | 260-600                 | 0                     | No                    | No                     | Puerto Rico     | Merten et al., 2018    |
| Surface                | 50-500                  | 0                     | No                    | No                     | Canary Islands  | Castro et al., 1999    |
| Surface                | 1000-2200               | 0                     | No                    | No                     | American Samoa  | Buckley & Miller, 1994 |
| Surface                | 2000-2500               | 0                     | No                    | No                     | Martinique      | Doray et al., 2007     |

495

496

497

498

499 Table 2. Species documented on these subsurface FADs in the Exuma Sound, separated into  
 500 resident intransatant versus ephemeral circumnatant species, compared to other epipelagic fishes  
 501 documented in the Exuma Sound but remain absent from our subsurface FAD surveys. An  
 502 asterisk (\*) denotes species present within first 6 months after FAD deployment. Compiled from  
 503 Schneider unpublished data, Talwar unpublished data, and personal communications.

| <b>Present on subsurface FAD surveys</b> |                                   | <b>Absent from subsurface FAD surveys</b> |
|------------------------------------------|-----------------------------------|-------------------------------------------|
| <b>Intranatant</b>                       | <b>Circumnatant</b>               | <b>Recorded in Exuma Sound</b>            |
| <i>Aluterus Monoceros</i> *              | <i>Acanthocybium solandri</i> *   | <i>Carcharhinus longimanus</i>            |
| <i>Balistes capriscus</i> *              | <i>Carcharhinus falciformis</i> * | <i>Istiophorus albicans</i>               |
| <i>Cantherhines</i> spp.*                | <i>Carcharhinus obscurus</i>      | <i>Kajikia albidus</i>                    |
| <i>Canthidermis sufflamen</i> *          | <i>Cheilopogon melanurus</i>      | <i>Makaira nigricans</i>                  |
| <i>Carangidae</i> spp.*                  | <i>Coryphaena hippurus</i> *      | <i>Scomberomorus cavalla</i>              |
| <i>Caranx latus</i> *                    | <i>Elagatis bipinnulata</i> *     |                                           |
| <i>Caranx ruber</i> *                    | <i>Galeocerdo cuvier</i> *        |                                           |
| <i>Decapterus</i> spp.*                  | <i>Hemiramphus</i> spp.           |                                           |
| <i>Decapterus macarellus</i> *           | <i>Sarda sarda</i>                |                                           |
| <i>Pepilus triacanthus</i>               | <i>Sphyrna barracuda</i> *        |                                           |
| <i>Seriola rivoliana</i> *               | <i>Sphyrna mokorran</i>           |                                           |
|                                          | <i>Thunnus albacares</i>          |                                           |
|                                          | <i>Thunnus</i> spp.               |                                           |

504

505

506

507

508

509

510

511

512

513

514

515 Table 3. Recently utilized methods for FAD-based research, and advantages of a subsurface  
 516 design for new applications.

517

| <b>Examples of surface FAD-based methods</b> |                |                                                                                                                                           |                                                                                        |                                                                       |
|----------------------------------------------|----------------|-------------------------------------------------------------------------------------------------------------------------------------------|----------------------------------------------------------------------------------------|-----------------------------------------------------------------------|
| <b>Method</b>                                | <b>Species</b> | <b>Data Collected</b>                                                                                                                     | <b>Potential Influence of Data</b>                                                     | <b>References</b>                                                     |
| Acoustic telemetry attachment                | Fish           | Residence (presence/absence), some behavioral patterns                                                                                    | Reduction in fisheries interactions and bycatch                                        | Tolotti et al., 2020<br>Filmalter et al., 2015<br>Dagorn et al., 2007 |
| Video survey                                 | Humans, fish   | Fishing activity, Species presence/aggregation dynamics                                                                                   | Managing FAD use, understanding aggregation                                            | Merten et al., 2018<br>Doray et al., 2007                             |
| Echosounder/modelling                        | Any            | Biomass                                                                                                                                   | Understanding ecosystem effects of FADs                                                | Lopez et al., 2016                                                    |
| Animal collection                            | Bivalve        | Muscle tissue for stable isotope analysis, stomach contents                                                                               | Characterize low levels of pelagic food web, ecosystem-based management, diet analysis | Talwar unpublished                                                    |
| <b>Advantages of subsurface FADs</b>         |                |                                                                                                                                           |                                                                                        |                                                                       |
| <b>Use</b>                                   |                | <b>Advantage of proposed design</b>                                                                                                       |                                                                                        |                                                                       |
| Long-term fish census                        |                | Fish community can be monitored over longer periods in same location; abundance surveys may be representative of actual population trends |                                                                                        |                                                                       |
| Taut mooring line for gear deployment        |                | Can deploy/retrieve instruments or gear to depth while in stationary location                                                             |                                                                                        |                                                                       |
| Hydrophone for marine mammal detection       |                | FAD is rendered silent due to lack of surface hardware/buoy. No sound interference.                                                       |                                                                                        |                                                                       |

518

519

520

521

522

523

524

525

526

527

528 FIGURES

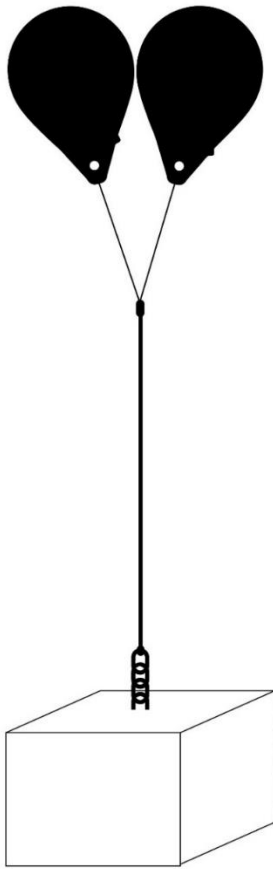

529  
530 Figure 1. Schematic of the subsurface fish aggregation device (FAD) currently being used at The  
531 Cape Eleuthera Institute, The Bahamas. FAD design consists of a concrete anchor block,  
532 mooring line, and two steel buoys. Steel buoys are moored 10m below the sea surface to prevent  
533 detection by fishers and to create tension and verticality in the mooring line for gear deployment.  
534 Diagram not to scale.

535

536

537



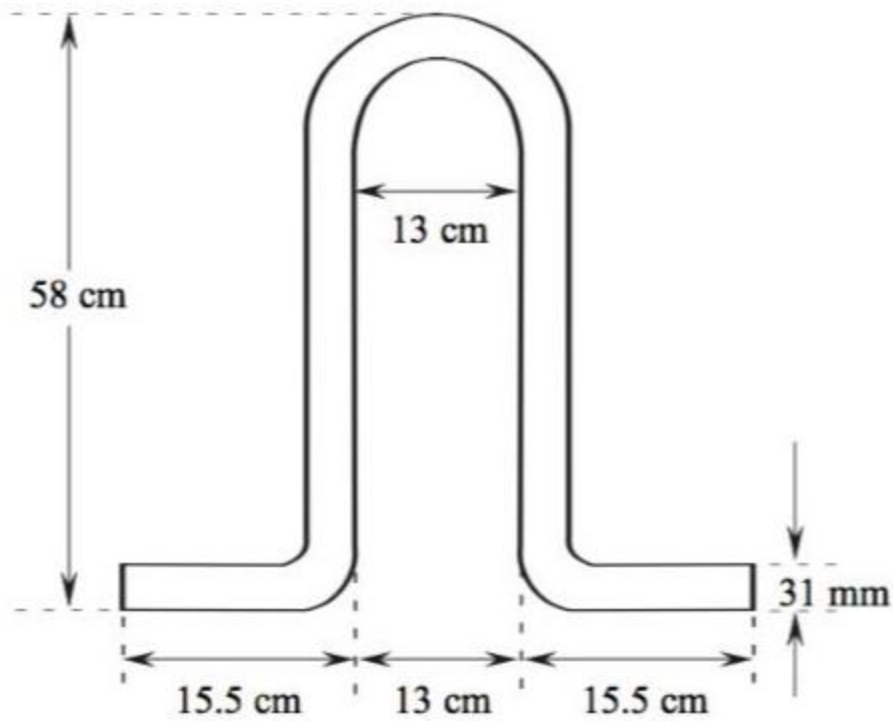

538

539 Figure 2. Stainless steel round stock bail that was incorporated into the top of the concrete  
540 anchor block to serve as the attachment point between the block and metal chain, which was the  
541 beginning of the mooring line.

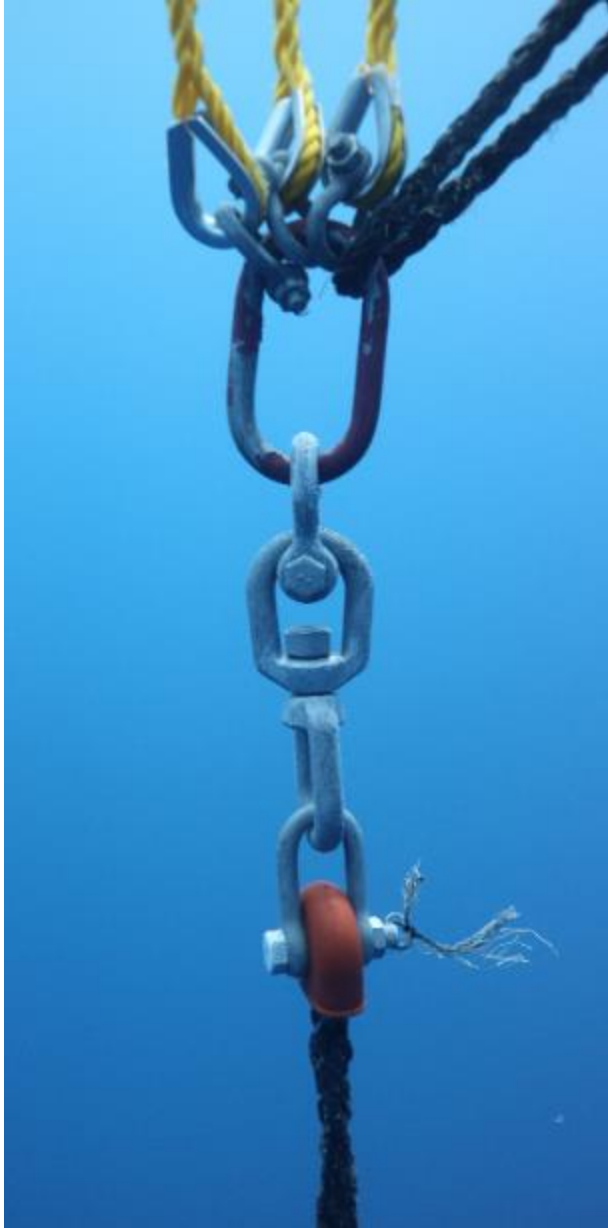

542

543 Figure 3. Top end of the mooring line showing an eye splice to a rope connector, swivel, bolt  
544 through shackle and 7/8" master link to which the buoys (and a safety line during deployment)  
545 were attached.

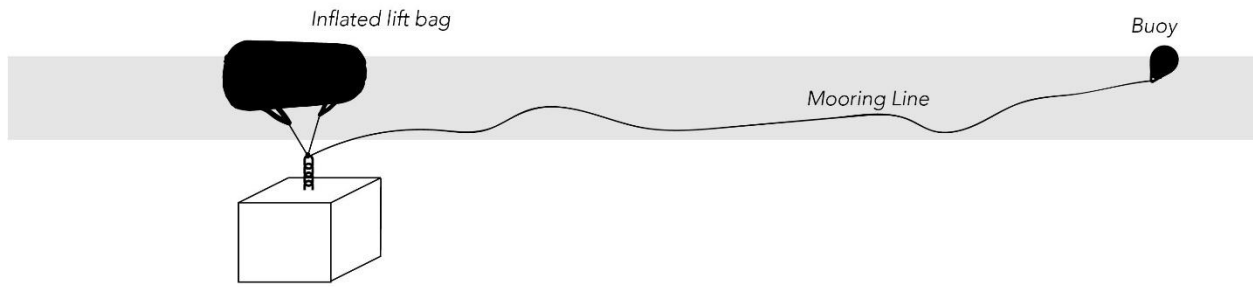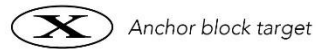

546

547 Figure 4. Initial stage of the FAD deployment process. The concrete anchor block is suspended

548 by lift bags and attached to the mooring line that has been deployed overboard onto the sea

549 surface down-current from the anchor. The anchor is positioned 1/3 the length of the mooring

550 line up-current of the targeted resting location.

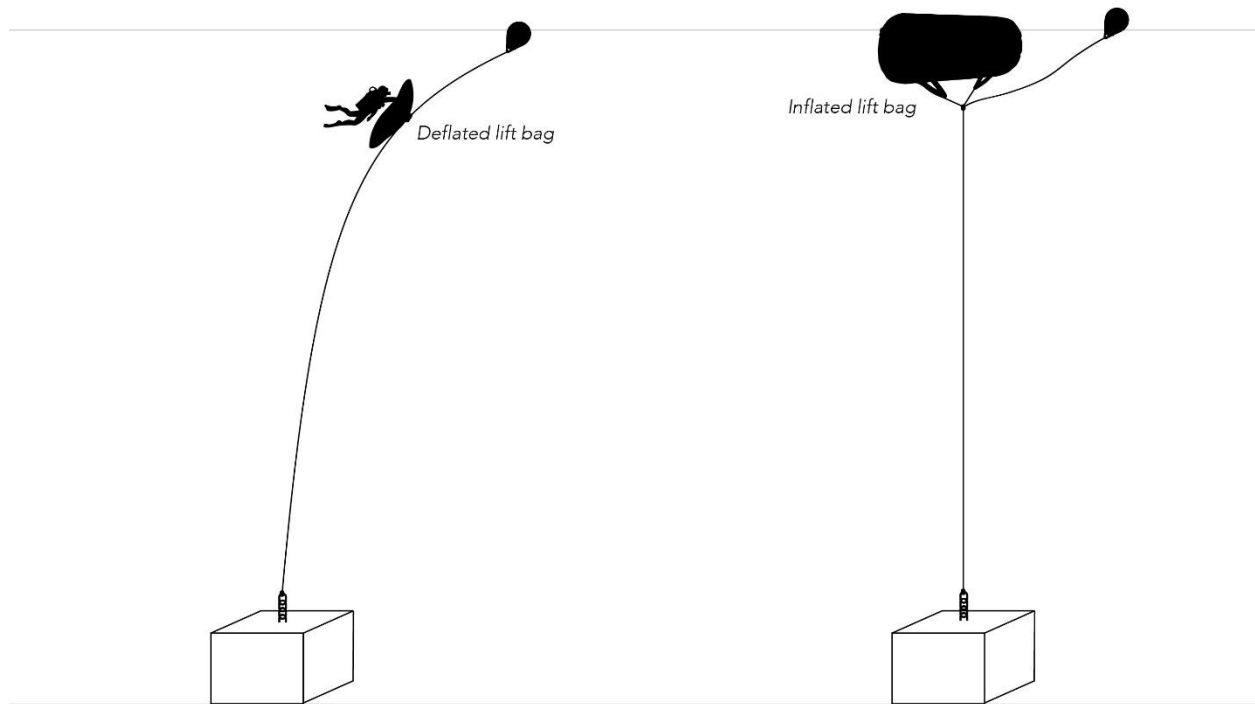

551

552 Figure 5. Schematic showing the process of removing slack line from the mooring line following  
553 deployment. A diver attaches a deflated lift bag to the slack mooring line using a Prusik hitch  
554 and slowly inflates the bag. This process is repeated until the desired tension on the mooring line  
555 has been reached and the steel buoys are then attached.
